# Supplementary material for: Segment-Specific Adhesion as a Driver of Convergent Extension
Source: PubMed Central journal article supplement (PMC4338282; doi:10.1371/journal.pcbi.1004092), 2015-02-23

without segment-specific adhesion      with segment-specific adhesion

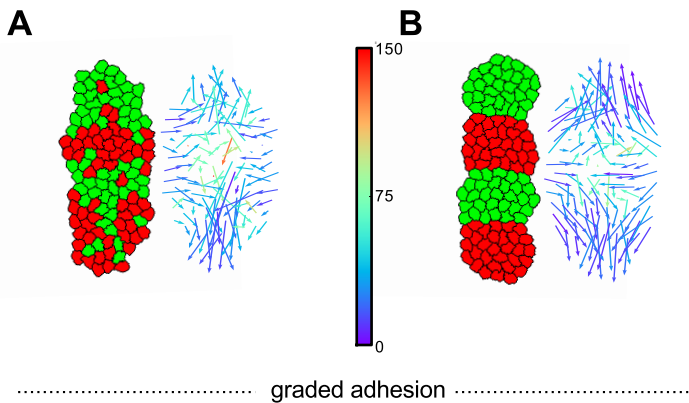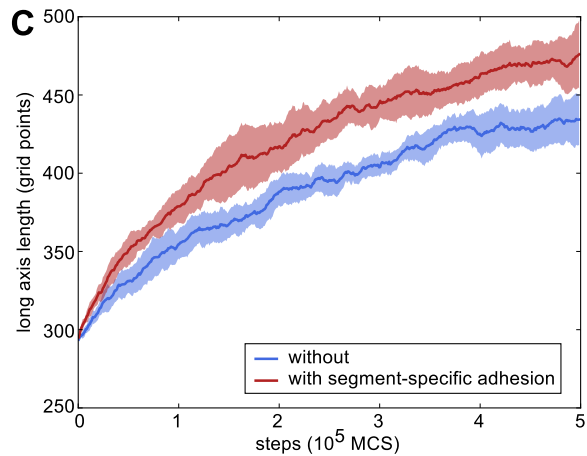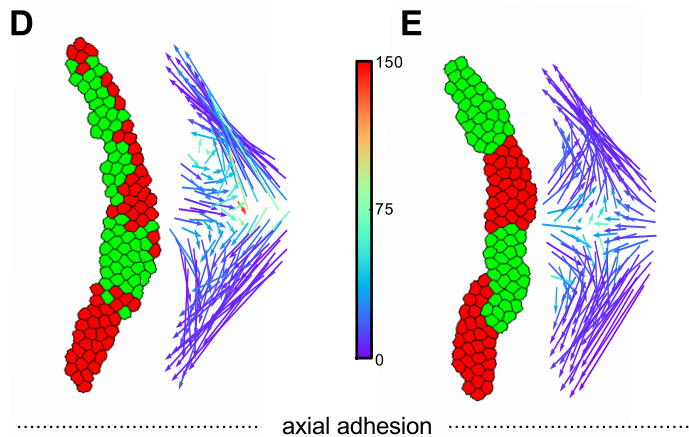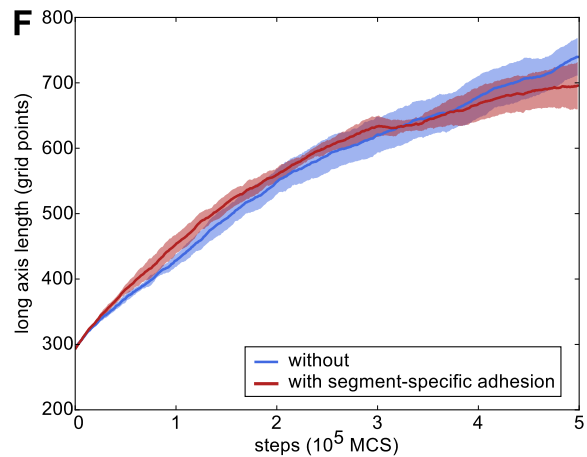

Supplement: pcbi.1004092.s001.pdf [file pcbi.1004092.s001.pdf]
