# Supplementary material for: Segment-Specific Adhesion as a Driver of Convergent Extension
Source: PubMed Central journal article supplement (PMC4338282; doi:10.1371/journal.pcbi.1004092), 2015-02-23
Supplement: pcbi.1004092.s006.pdf [file pcbi.1004092.s006.pdf]

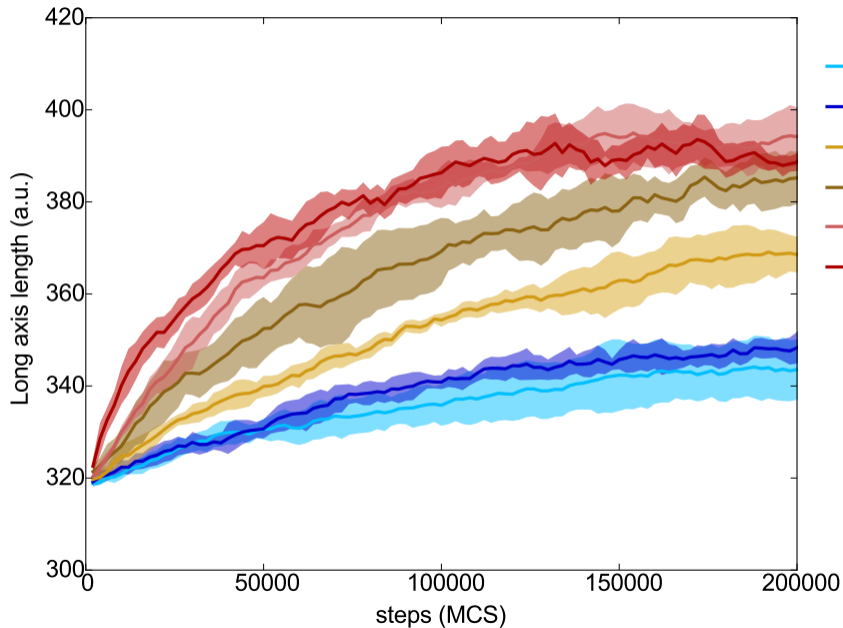

- weak gradients, no persistence
- weak gradients, with persistence
- medium gradients, no persistence
- medium gradients, with persistence
- strong gradients, no persistence
- strong gradients, with persistence
