# Supplementary material for: Segment-Specific Adhesion as a Driver of Convergent Extension
Source: PubMed Central journal article supplement (PMC4338282; doi:10.1371/journal.pcbi.1004092), 2015-02-23
Supplement: pcbi.1004092.s013.pdf [file pcbi.1004092.s013.pdf]

| $\gamma_{c,m} \rightarrow$<br>$\gamma_{r,g}$<br>$\downarrow$ | 2        | 6        | 10       | 14       |
|--------------------------------------------------------------|----------|----------|----------|----------|
| 2                                                            | 10,18,16 | 14,18,16 | 18,18,16 | 22,18,16 |
| 6                                                            |          | 12,18,12 | 16,18,12 | 20,18,12 |
| 10                                                           |          | 10,18,8  | 14,18,8  | 18,18,8  |
| 14                                                           |          |          | 12,18,4  | 16,18,4  |

**Supplementary table 1. J values of the parameter space of figure 3 and supplementary figure 2.**

The order of the values is  $J_{c,m}$  ,  $J_{r,g}$  ,  $J_{r,r}$ .
